# Supplementary material for: Temporal Stability of Grassland Soil Moisture Utilising Sentinel-2 Satellites and Sparse Ground-Based Sensor Networks
Source: MDPI journal article supplement (doi:10.3390/rs16020220), 2024-01-05
Supplement: s1 [file s1]

**Table S1.** All S-2 passes for Rossmore and Stradone used in the study. Dates in bold are those used in the validation with in situ VSM sensors.

| Year | Rossmore Dates (DD/MM)                                                                       | Stradone Dates (DD/MM)                          |
|------|----------------------------------------------------------------------------------------------|-------------------------------------------------|
| 2015 |                                                                                              | 29/09                                           |
| 2017 | 01/01, 20/06, 08/09, 07/11                                                                   | 01/01, 20/06, 07/11, 27/12                      |
| 2018 | 10/02, 21/04, 06/05, 16/05, 25/06,<br>30/06, 10/07, 18/10, 28/10, 07/12, 12/12               | 06/01, 20/02, 25/02, 21/04, 10/07               |
| 2019 | 16/01, 07/03, 18/09                                                                          | 10/02, 18/09, 28/10                             |
| 2020 | 20/02, 01/03, 06/03, 15/04, 12/10                                                            | 25/04, 27/09, 06/11                             |
| 2021 | <b>25/01, 01/03, 26/03, 10/04, 25/04,</b><br><b>05/05, 29/06, 19/07, 07/09, 21/11, 26/11</b> | <b>16/03, 25/04, 29/06, 28/08, 07/09, 21/11</b> |
| 2022 | <b>16/03, 26/03, 31/03</b>                                                                   | <b>14/02, 01/03, 21/03, 26/03, 20/04, 10/05</b> |

**Table S2.** Vegetation indices from reflectance,  $R$ , in S-2 optical bands.

| Vegetation index                                | Equation                                                |
|-------------------------------------------------|---------------------------------------------------------|
| Normalised Difference Vegetation Index (NDVI)   | $\frac{R_8 - R_4}{R_8 + R_4}$                           |
| Enhanced Vegetation Index (EVI)                 | $\frac{2.5(R_8 - R_4)}{R_8 + 6R_4 - 7.5R_2 + 1}$        |
| Modified Soil Adjusted Vegetation Index (MSAVI) | $0.5\{2R_8 + 1 - [(2R_8 + 1)^2 - 8(R_8 - R_4)]^{0.5}\}$ |
| Normalised Difference Red Edge Index (NDREI)    | $\frac{R_8 - R_5}{R_8 + R_5}$                           |
